# Supplementary material for: A series of new silver selenites with d0-TM cations
Source: Royal Society of Chemistry journal article supplement (doi:10.1039/c6ra17867g), 2016-01-01
Supplement: c6ra17867g2.pdf [file c6ra17867g2.pdf]

## A Series of Novel Silver Selenites with d<sup>0</sup>-TM Cations

Cheng Qian<sup>a, b</sup>, Fang Kong<sup>a</sup>, Jiang-Gao Mao<sup>\*a</sup>

**Table S1.** Calculated dipole moments for all asymmetric units and the unit cells in

$\text{Ag}_3\text{Ti}_3\text{O}_3(\text{SeO}_3)_4\text{F}$  (D = Debyes).

**Figure S1.** Simulated and experimental XRD powder patterns of **1** (a), **2** (b), **3** (c) and **4**(d).

**Figure S2.** TGA and DTA curves of compounds **1**(a), **2**(b), **3**(c) and **4**(d).

**Figure S3.** IR spectra of compounds **1**(a), **2**(b), **3**(c) and **4**(d).

**Figure S4.** UV-Vis-NIR Diffuse Reflectance spectra of compounds **1**(a), **2**(b), **3**(c) and **4**(d).

**Table S1.** Calculated dipole moments for all asymmetric units and the unit cells in  $\text{Ag}_3\text{Ti}_3\text{O}_3(\text{SeO}_3)_4\text{F}$  (D = Debyes)

|                                                            | Species             | dipole moment (D) |        |        |       |
|------------------------------------------------------------|---------------------|-------------------|--------|--------|-------|
|                                                            |                     | total             | x      | y      | z     |
| $\text{Ag}_3\text{Ti}_3\text{O}_3(\text{SeO}_3)_4\text{F}$ | Ti(1)O <sub>6</sub> | 4.073             | 3.736  | -1.501 | 0.616 |
|                                                            |                     | 4.073             | -3.168 | -2.485 | 0.616 |
|                                                            |                     | 4.073             | -0.569 | 3.986  | 0.616 |
|                                                            |                     | 4.073             | 0.568  | -3.986 | 0.616 |
|                                                            |                     | 4.073             | 3.167  | 2.485  | 0.616 |
|                                                            |                     | 4.073             | -3.736 | 1.501  | 0.616 |
|                                                            | Se(1)O <sub>3</sub> | 9.668             | 8.620  | 4.302  | 0.816 |
|                                                            |                     | 9.668             | -8.035 | 5.314  | 0.816 |
|                                                            |                     | 9.669             | -0.585 | -9.617 | 0.816 |
|                                                            |                     | 9.668             | 0.584  | 9.616  | 0.816 |
|                                                            |                     | 9.668             | 8.036  | -5.314 | 0.816 |
|                                                            |                     | 9.668             | -8.620 | -4.302 | 0.816 |
|                                                            | Se(2)O <sub>3</sub> | 9.374             | 0      | 0      | 9.374 |
|                                                            |                     | 9.374             | 0      | 0      | 9.374 |
|                                                            | Net(unit cell)      | 27.33             | 0      | 0      | 27.33 |

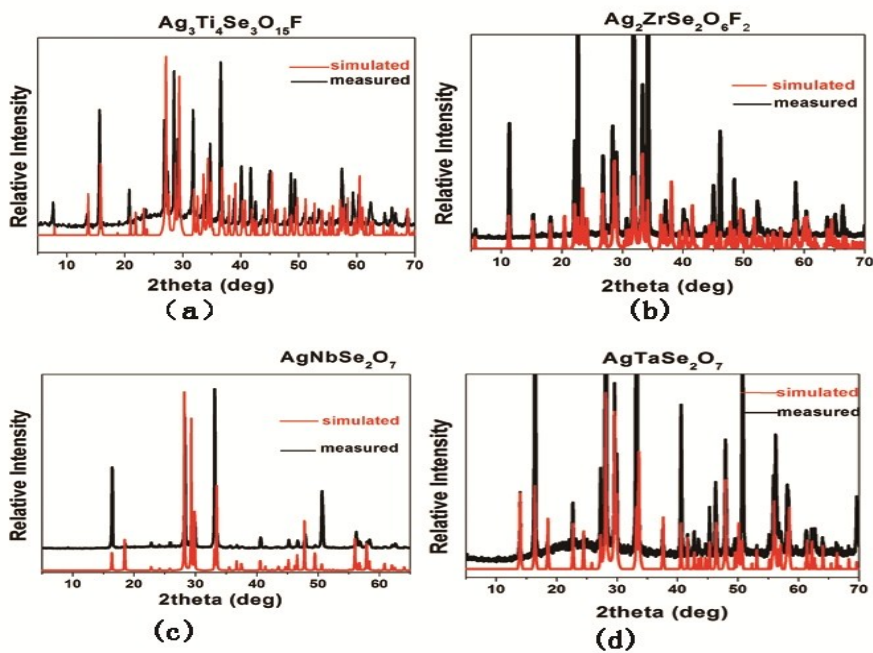

**Figure S1.** Simulated and experimental XRD powder patterns of **1** (a), **2** (b), **3** (c) and **4**(d).

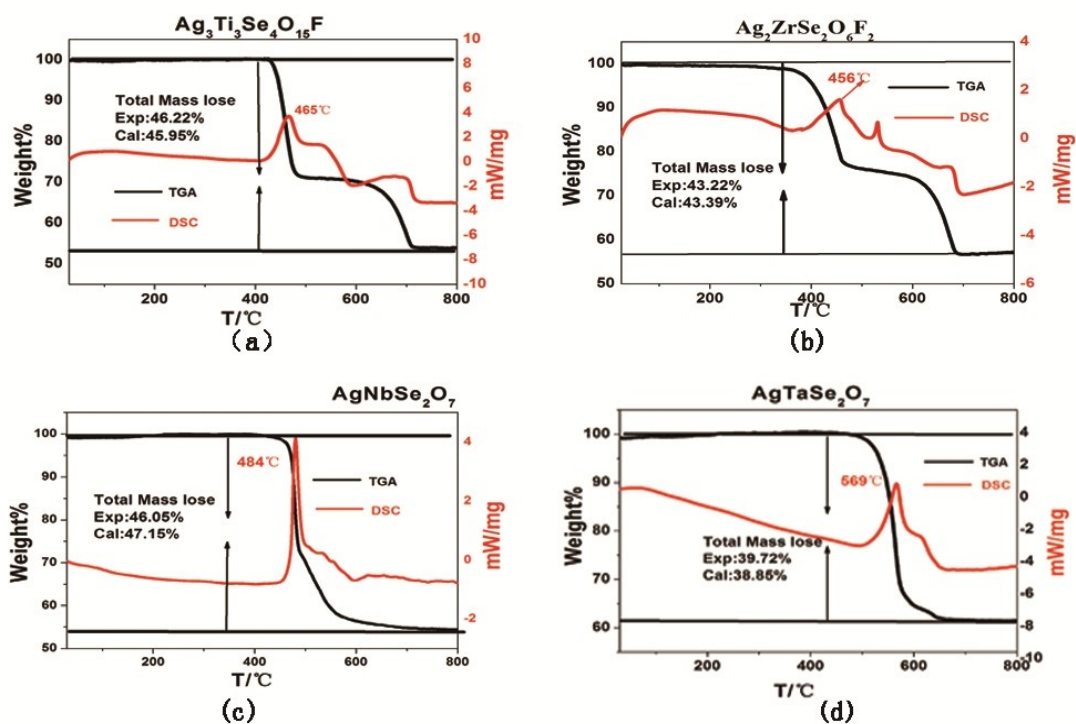

**Figure S2.** TGA and DTA curves of compounds **1(a)**, **2(b)**, **3(c)** and **4(d)**.

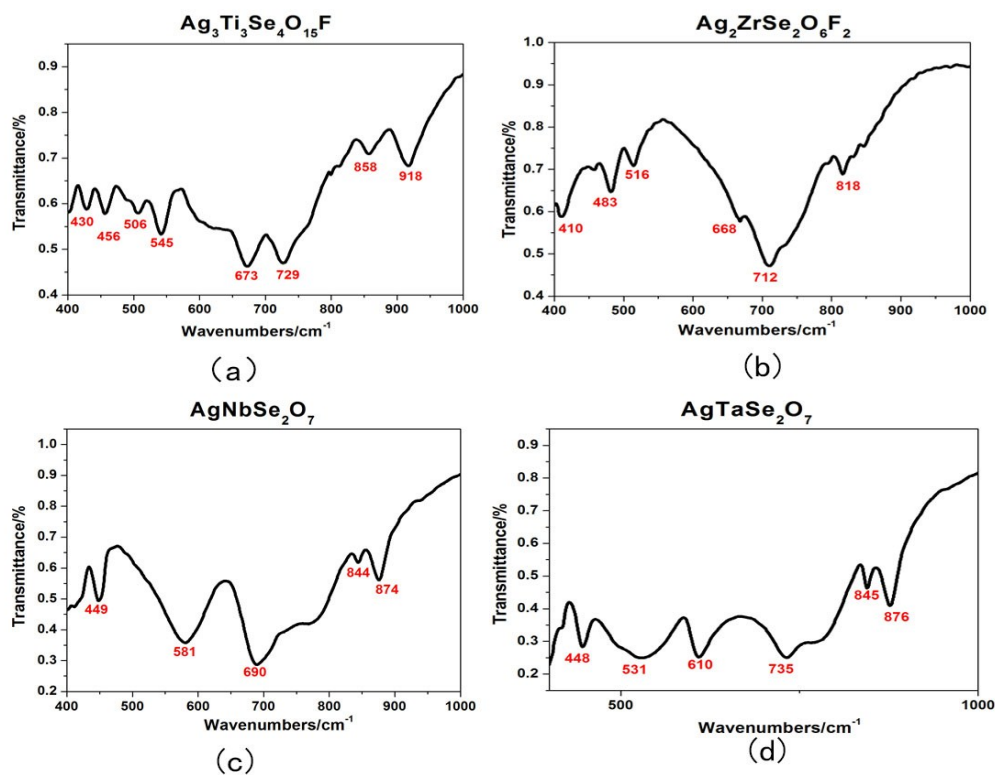

**Figure S3.** IR spectra of compounds **1(a)**, **2(b)**, **3(c)** and **4(d)**.

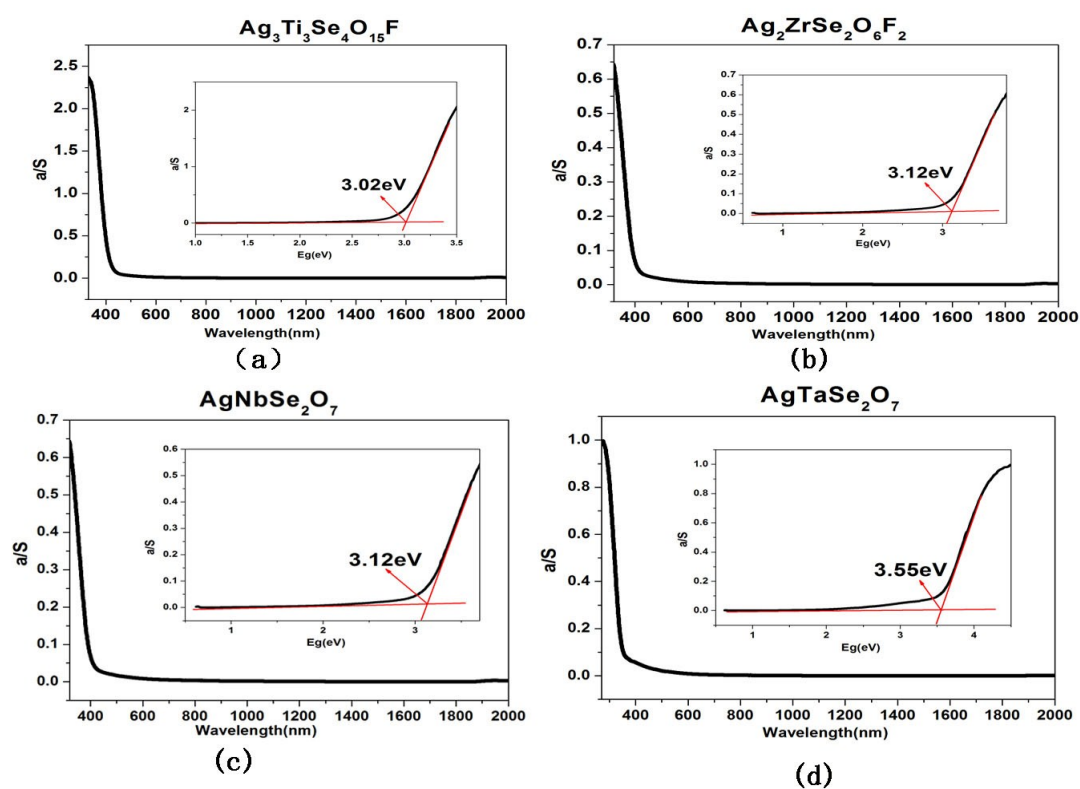

**Fig S4.** UV-Vis-NIR Diffuse Reflectance spectra of compounds **1(a)**, **2(b)**, **3(c)** and **4(d)**.
